# Supplementary material
Source: PubMed Central journal article supplement (PMC4426972)

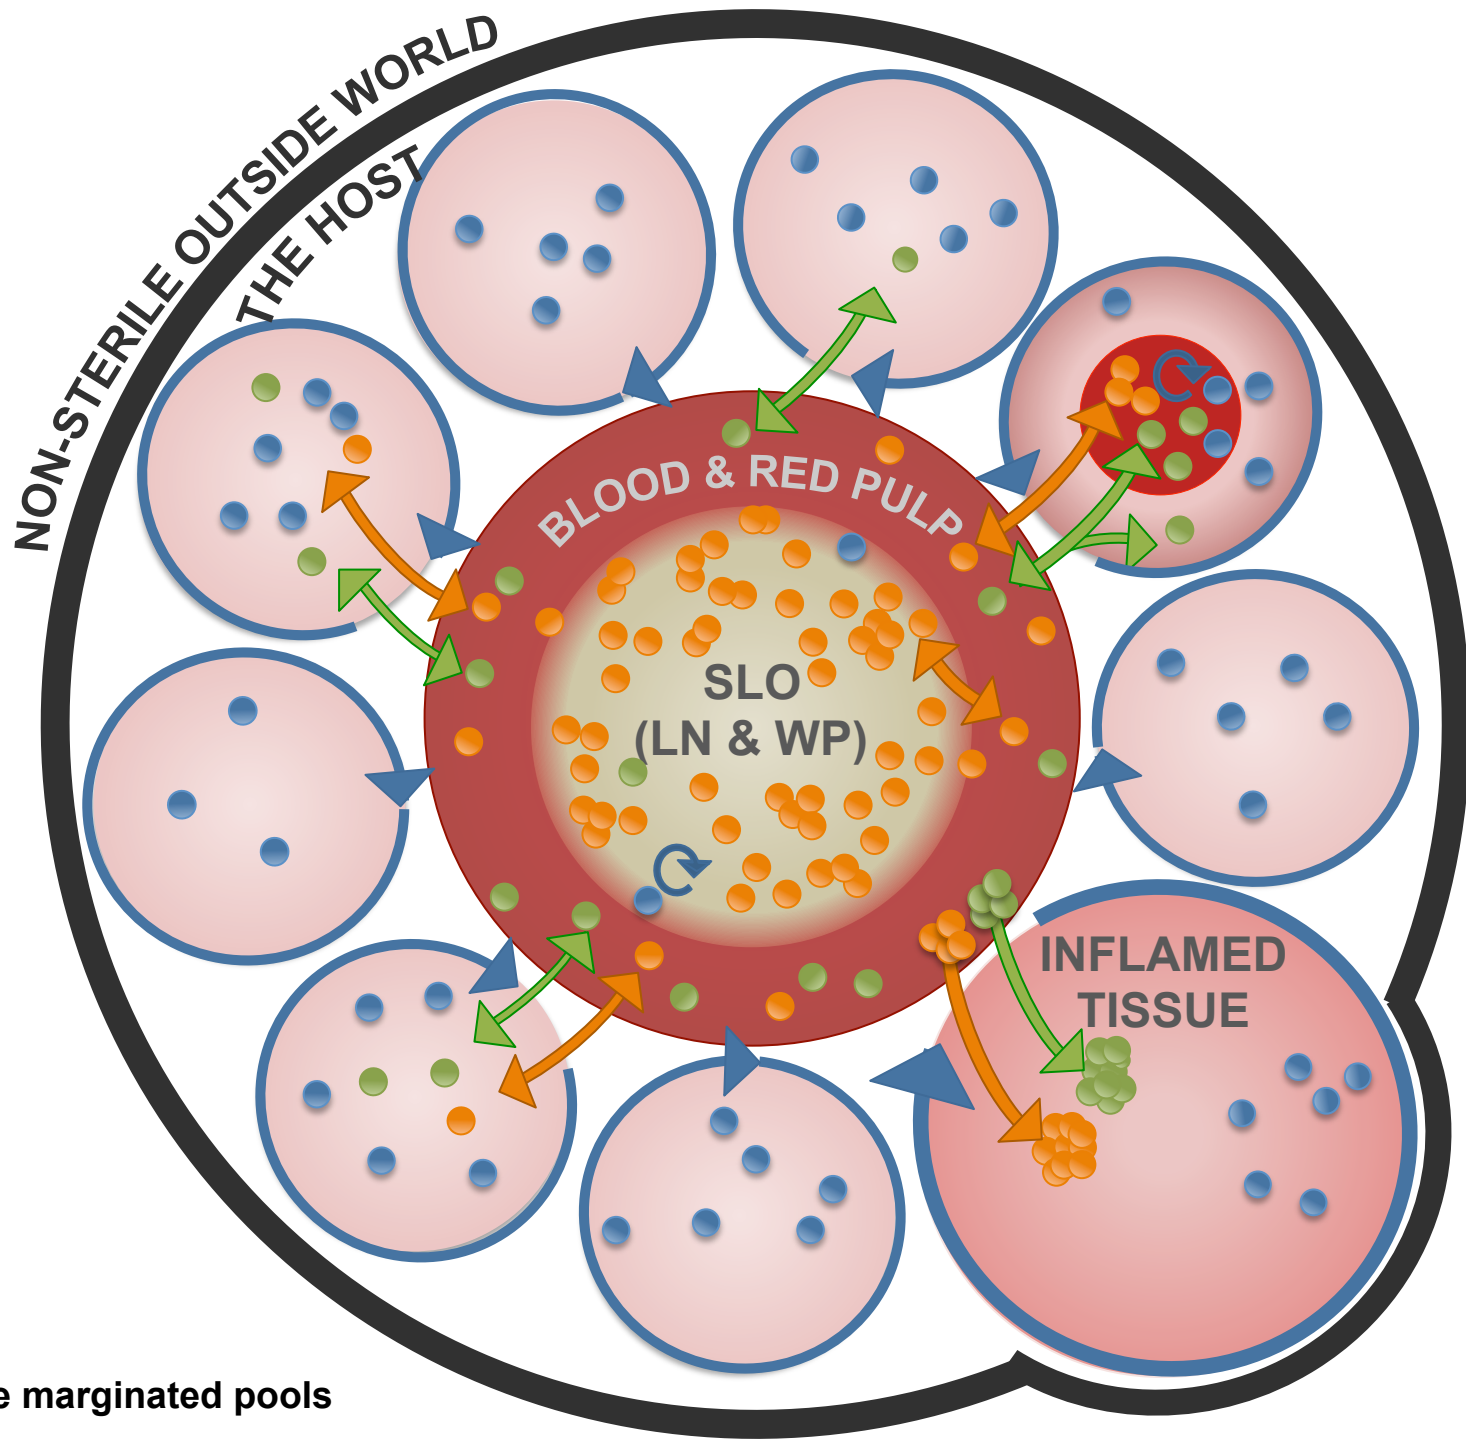

- TRM
- TEM
- TCM
- NLT
- NLT with extensive marginated pools

Supplement: NIHMS682332-supplement-2.pdf [file NIHMS682332-supplement-2.pdf]

**A**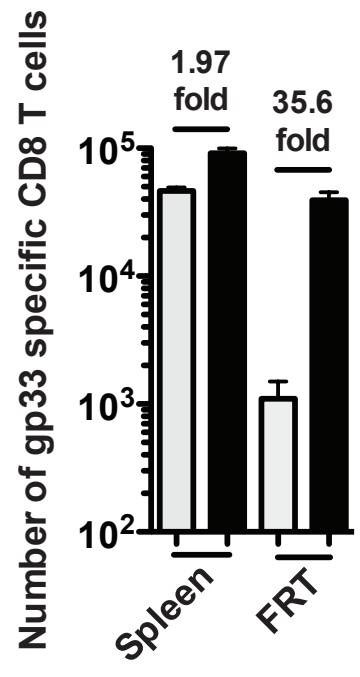**B**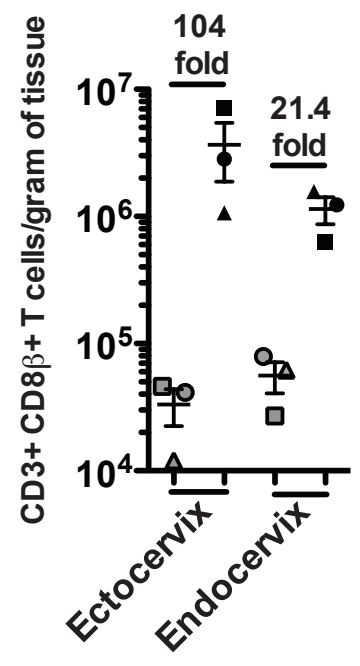

Supplement: NIHMS682332-supplement-3.pdf [file NIHMS682332-supplement-3.pdf]
